# Supplementary material for: Enhanced efficacy in drug-resistant cancer cells through synergistic nanoparticle mediated delivery of cisplatin and decitabine
Source: Royal Society of Chemistry journal article supplement (doi:10.1039/c9na00684b), 2020-01-01
Supplement: c9na00684b1.pdf [file c9na00684b1.pdf]

## Supporting Information

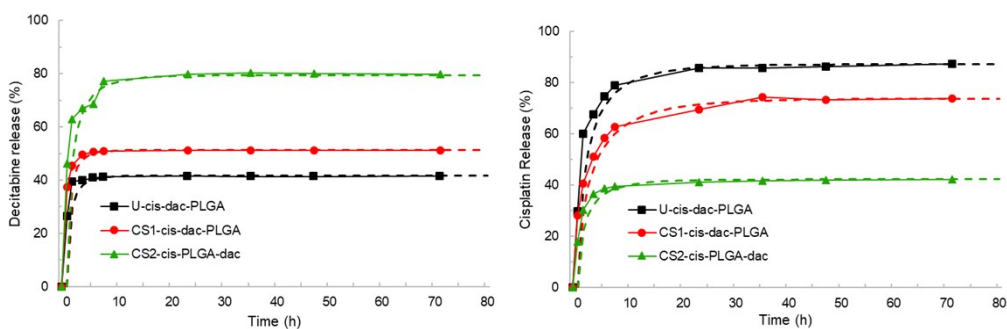

Figure A1. Comparison of experimental release rates (points and dashed lines) with the fitted model neglecting the CS structure of the particles (uniform model).

| Formulation      | Drug       | $D \text{ m}^2\text{s}^{-1}$ |
|------------------|------------|------------------------------|
| U-cis-dac-PLGA   | Cisplatin  | $1.4 \times 10^{-19}$        |
| CS1-cis-dac-PLGA | Cisplatin  | $4 \times 10^{-20}$          |
| CS2-cis-PLGA-dac | Cisplatin  | $5 \times 10^{-20}$          |
| U-cis-dac-PLGA   | Decitabine | $4.4 \times 10^{-19}$        |
| CS1-cis-dac-PLGA | Decitabine | $1.8 \times 10^{-19}$        |
| CS2-cis-PLGA-dac | Decitabine | $7 \times 10^{-20}$          |

Table A1: Diffusion coefficients obtained using the uniform sphere model.

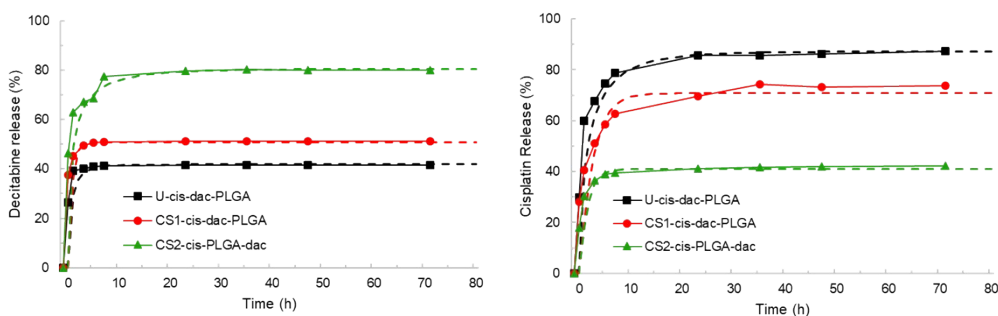

Figure A2. Comparison of experimental release rates (points and dashed lines) with the fitted model taking account of the CS structure of the particles (CS model).

| Formulation      | Drug       | $D \text{ m}^2\text{s}^{-1}$ |
|------------------|------------|------------------------------|
| U-cis-dac-PLGA   | Cisplatin  | $1.4 \times 10^{-19}$        |
| CS1-cis-dac-PLGA | Cisplatin  | $8 \times 10^{-20}$          |
| CS2-cis-PLGA-dac | Cisplatin  | $1.1 \times 10^{-19}$        |
| U-cis-dac-PLGA   | Decitabine | $4.4 \times 10^{-19}$        |
| CS1-cis-dac-PLGA | Decitabine | $2.9 \times 10^{-19}$        |
| CS2-cis-PLGA-dac | Decitabine | $2 \times 10^{-20}$          |

Table A2: Diffusion coefficients obtained using the CS model.

a)

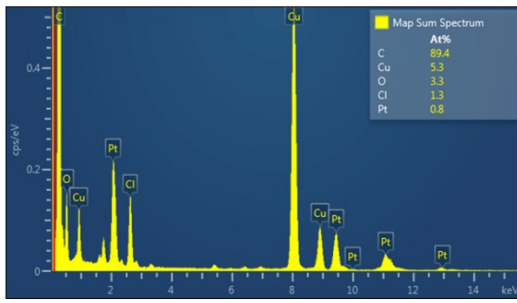

b)

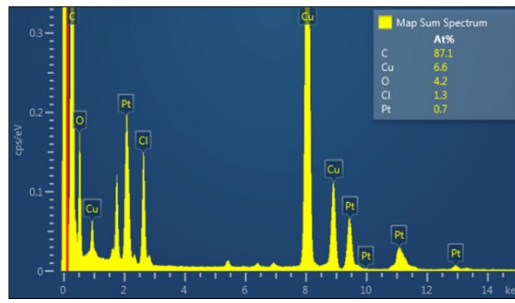

Figure A3. Typical EDS spectra of cisplatin region of a) CS2-cis-dac-PLGA and b) CS2-cis-PLGA-dac
